# Supplementary material
Source: PubMed Central journal article supplement (PMC3989358)
Supplement: chan-7-303-s01.pdf [file chan-7-303-s01.pdf]

## **Supplemental Material to:**

**Avia Rosenhouse-Dantsker, Sergei Noskov, Diomedes E.  
Logothetis, Irena Levitan**

**Cholesterol sensitivity of KIR2.1 depends on functional  
interlinks between the N and C termini**

**May/June 2013; Vol 7 (Issue 4)**

**<http://dx.doi.org/10.4161/chan.25437>**

**<http://www.landesbioscience.com/journals/channels/article/25437/>**

|        | βA      | Slide HLX                 | TM1                                    |                                         |                             |                  |        |            |         |                 |                      |        |        |                 |
|--------|---------|---------------------------|----------------------------------------|-----------------------------------------|-----------------------------|------------------|--------|------------|---------|-----------------|----------------------|--------|--------|-----------------|
| Kir2.1 | 40      | RQQRSRFVKKDGHCNVQ         | INVGEKGORYLADIFTTCVDIRWRWMLVIFCLAFVLSW |                                         |                             |                  |        |            |         |                 |                      |        |        |                 |
| Kir2.2 | 39      | RRRCRNRFVKKNGQCNIEFANMDEK | SQRYLADIFTTCVDIRWRWMLLIFSLAFLASW       |                                         |                             |                  |        |            |         |                 |                      |        |        |                 |
| Kir2.3 | 14      | RRRRNR                    | FVKKNGQCNVYFANL                        | SNKSQRYMADIFTTCVDIRWRWMLMIFSAFLVSW      |                             |                  |        |            |         |                 |                      |        |        |                 |
| Kir3.1 | 41      | -KKR-QRFVDK               | NGRCNVQHG                              | NLGSETSRYSLDLFTTLLVDLKWRRNLLFIFILTYTVAW |                             |                  |        |            |         |                 |                      |        |        |                 |
| Kir3.2 | 51      | TKRKIQRYVRKDKCNVHHGNVRET  | -YRYLTDIFTTLLVDLKWRRNLLIFVMVYTVTW      |                                         |                             |                  |        |            |         |                 |                      |        |        |                 |
| Kir3.4 | 46      | GKKPRQR                   | YMEKSGKCNVHHGNVQET                     | -YRYSDDLFTTLLVDLKWRRNLLVFTMYYTVIW       |                             |                  |        |            |         |                 |                      |        |        |                 |
|        | TM1     |                           | P-HLX                                  |                                         |                             |                  |        |            |         |                 |                      |        |        |                 |
| Kir2.1 | 97      | LFFGCVF                   | WLIALHGDLDTS                           | -----KVKACVSEVNSFTA AFLF                |                             |                  |        |            |         |                 |                      |        |        |                 |
| Kir2.2 | 96      | LLFGIIF                   | VVAHAGDLEPAE                           | -----GRGRTPCVMQVHGFMAAFLF               |                             |                  |        |            |         |                 |                      |        |        |                 |
| Kir2.3 | 71      | LFFGLL                    | FWCIAFFHG                              | LEASPGVPAAGGPAAGGGAAVPKPCIMHVNGLGAF LF  |                             |                  |        |            |         |                 |                      |        |        |                 |
| Kir3.1 | 96      | LFMASM                    | WVIA YTRGD                             | LNAK-----VGN YTPCVANVYVFP SAFLF         |                             |                  |        |            |         |                 |                      |        |        |                 |
| Kir3.2 | 107     | LFFGMI                    | WVLIAYIRGDMHIE                         | -----DPSWTPCVTNLNGFVSAFLF               |                             |                  |        |            |         |                 |                      |        |        |                 |
| Kir3.4 | 102     | LFFGFI                    | WVLIAYIRGDLDHVG                        | -----DQEWIPCVENLSGFFVSAFLF              |                             |                  |        |            |         |                 |                      |        |        |                 |
|        | P-HLX   | TM2                       |                                        |                                         |                             |                  |        |            |         |                 |                      |        |        |                 |
| Kir2.1 | 136     | SIETQTTIGY                | FRCVTECP                               | IAVFMVVFQSI                             | VGCIIIDAFIIGAVMAKMAKPKKRNET |                  |        |            |         |                 |                      |        |        |                 |
| Kir2.2 | 137     | SIETQTTIGY                | GLRCVTEECP                             | VAVFVVAQSI                              | VGCIIIDSFMI                 | GAIMAKMARPKKRAQT |        |            |         |                 |                      |        |        |                 |
| Kir2.3 | 128     | SVETQTTIGY                | FRCVTEECP                              | LAVIAVAVVQSI                            | VGCVIDSFMI                  | GIMAKMARPKKRAQT  |        |            |         |                 |                      |        |        |                 |
| Kir3.1 | 137     | FIETEATIGY                | RYITDKCPE                              | GIILFLFQSI                              | ILGSIIVDAFLIGCMFI           | KMSQPKKRAET      |        |            |         |                 |                      |        |        |                 |
| Kir3.2 | 148     | SIETE                     | TTIGYRVITDKCPE                         | GIILLLLQSV                              | LGSIVNAFMV                  | GCMFVKISQPKKRAET |        |            |         |                 |                      |        |        |                 |
| Kir3.4 | 143     | SIETE                     | TTIGYFRVITEK                           | CPEGIILLLVQ                             | AILGSIIVNAFMV               | GCMFVKISQPKKRAET |        |            |         |                 |                      |        |        |                 |
|        | βB      | βC                        | βD                                     | βE                                      |                             |                  |        |            |         |                 |                      |        |        |                 |
| Kir2.1 | 193     | LVS                       | SHNAVIA                                | MRD                                     | GKLC                        | LMWRVGNL         | RKSHI  | VEAHVRAQL  | LKSRI   | TSEGEYI         | PLDQID               |        |        |                 |
| Kir2.2 | 194     | LLFS                      | HNAVVA                                 | LDGK                                    | LC                          | LMWRVGNL         | RKSHI  | VEAHVRAQL  | LKSRI   | TSEGEYI         | PLDQID               |        |        |                 |
| Kir2.3 | 185     | LLFS                      | HNAV                                   | ISVR                                    | DKL                         | CLMWRVGNL        | RKSHI  | VEAHVRAQL  | LKSRI   | TYMTQ           | EGEYIPLDQRD          |        |        |                 |
| Kir3.1 | 194     | LMF                       | SEHAVI                                 | SMR                                     | DGKLT                       | LMFRVGNL         | RNSHVS | QAIRCKLL   | LKSRT   | PEGEF           | PLDQLE               |        |        |                 |
| Kir3.2 | 205     | LVS                       | THAVI                                  | SMR                                     | DGKLC                       | LMFRVGD          | LRNSHI | VEASIRAKLI | LKSQT   | SEGEFI          | PLNQTD               |        |        |                 |
| Kir3.4 | 200     | LMF                       | SNAV                                   | ISMR                                    | DEKLC                       | LMFRVGD          | LRNSHI | VEASIRAKLI | LKSRT   | KEGEFI          | PLNQTD               |        |        |                 |
|        | EF-loop | βF                        | βG                                     | GA-loop                                 | αA                          | βH               | G-loop |            |         |                 |                      |        |        |                 |
| Kir2.1 | 250     | INV                       | GDSGID                                 | RIFL                                    | VSPITIV                     | HEID             | EDSPL  | LYDL       | SKQID   | DNADFE          | IVVILEGMVEATA        |        |        |                 |
| Kir2.2 | 251     | IDV                       | GDKGLD                                 | RIFL                                    | VSPITIL                     | HEID             | EASPL  | FGLSRQD    | LETDD   | FEIVVILEGMVEATA |                      |        |        |                 |
| Kir2.3 | 242     | LVNGY                     | DIGLDRIFL                              | VSP                                     | IIVHEID                     | EDSPL            | LYGM   | GKEE       | LESEDFE | IVVILEGMVEATA   |                      |        |        |                 |
| Kir3.1 | 251     | LDV                       | GFTGAD                                 | QLFLV                                   | SP                          | TI               | CHVID  | AKSP       | FYDL    | SQSMQTE         | QFEIVVILEGIVETTG     |        |        |                 |
| Kir3.2 | 262     | INV                       | GYTGDDR                                | LLFLV                                   | SP                          | LIIS             | HEIN   | QQSP       | FWET    | SKAQL           | PKEELEIVVILEGMVEATG  |        |        |                 |
| Kir3.4 | 257     | INV                       | GFTGDDR                                | LLFLV                                   | SP                          | LIIS             | HEIN   | EKS        | PFWE    | MSQAQL          | HQEEFEVIVVILEGMVEATG |        |        |                 |
|        | G-loop  | βI                        | βJ                                     | βK                                      | βL                          | βM               | βN     | αB         |         |                 |                      |        |        |                 |
| Kir2.1 | 307     | MTTQ                      | RSSYL                                  | LANE                                    | IL                          | WMGHR            | YEP    | VL         | FE      | EKKHY           | KVDYSR               | FHKTYE | VPNTPL | CSARDLAEKK      |
| Kir2.2 | 308     | MTTQ                      | RSSYL                                  | LANE                                    | IL                          | WMGHR            | FEP    | VL         | FE      | EKKHY           | KVDYSR               | FHKTYE | VPNTPL | PRCSAKDLVENK    |
| Kir2.3 | 299     | MTTQ                      | RSSYL                                  | LANE                                    | IL                          | WMGHR            | FEP    | VL         | FE      | EKKSHY          | KVDYSR               | FHKTYE | VAGT   | PPCSARELQESK    |
| Kir3.1 | 308     | MTQ                       | ARTSY                                  | TEDE                                    | VL                          | WMGHR            | FF     | FPV        | IS      | LE              | GFFK                 | VDSQ   | FHAT   | FVPTPPYSVKEQEML |
| Kir3.2 | 319     | MTQ                       | RSSYIT                                 | SEIL                                    | WMGHR                       | FT               | VP     | LT         | LE      | DGFY            | EV                   | DYNS   | FHE    | TYETS           |
| Kir3.4 | 314     | MTQ                       | RSSYMD                                 | TE                                      | VL                          | WMGHR            | FT     | VP         | LT      | LE              | KGFY                 | EV     | DYNT   | FHD             |

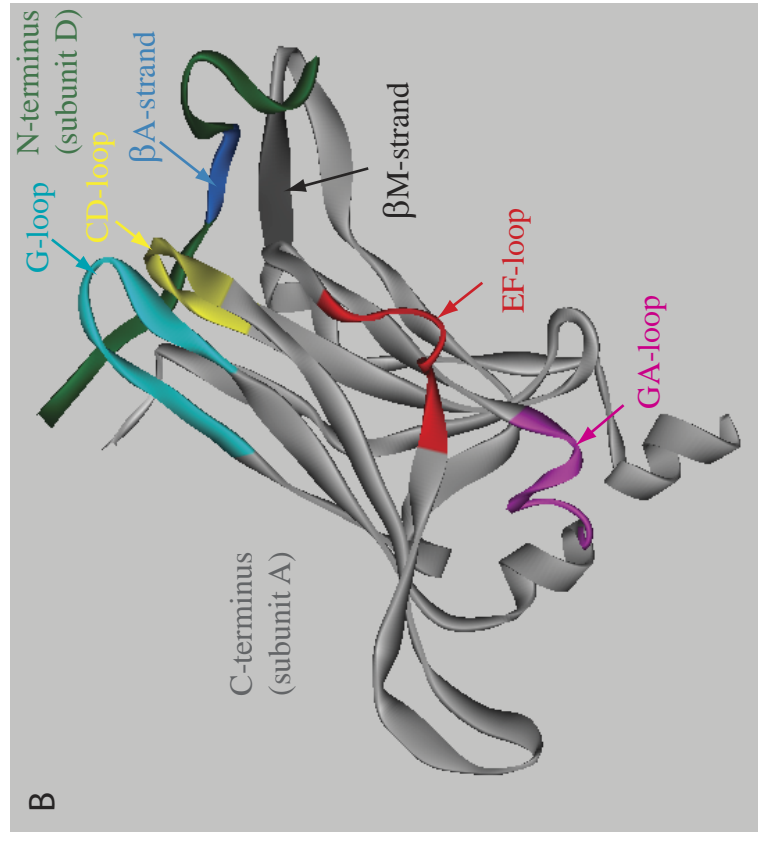

**Supplementary Fig. S1.** (A) Multiple sequence alignment and secondary structural elements. Red fonts indicate identity, green fonts indicate strong similarity and blue fonts indicate weak similarity. Residues discussed in the paper are highlighted yellow: V56 and Q57 of the βA strand of the N-terminus, L221 of the CD loop, N251 of the EF loop, Y280 and L282 of the GA loop. (B) A ribbon model of the cytosolic domain of one subunit of Kir2.1 showing the regions discussed in the paper.
